# Supplementary material for: Horizontal Transfer, Not Duplication, Drives the Expansion of Protein Families in Prokaryotes
Source: PLOS journal article supplement (doi:10.1371/journal.pgen.1001284), 2011-01-27
Supplement: S6 (10.1371/journal.pgen.1001284.s006) [file journal.pgen.1001284.s006]

| R | Phyletic Pattern | # | Description |
| --- | --- | --- | --- |
| 1 | 01**2**00000000000000000000000000000000000000 | 21 | ***Escherichia coli* O157:H7 EDL933** |
| 2 | 0**2**000000000000000000000000000000000000000 | 18 | ***Escherichia coli* O157:H7 EDL933** |
| 3 | 0000000001000000001000**2**111000000000000000 | 14 | ***Salmonella enterica Typhi* CT18** |
| 4 | 0000000000**2**000000000000000000000000000000 | 11 | ***Escherichia coli* ED1a** |
| 5 | 0000000000000000000**2**000000000000000000000 | 11 | ***Escherichia coli* O157:H7 str. EC4115** |
| R | Phyletic Pattern | # | Description |
| 1 | 0**2**000000000000000 | 44 | ***Streptococcus agalactiae* NEM316** |
| 2 | **22**111111111111111 | 12 | ***Streptococcus agalactiae*** |
| 3 | **2**1000000000000000 | 7 | ***Streptococcus agalactiae* 2603V/R** |
| 4 | **2**0000000000000000 | 5 | ***Streptococcus agalactiae* 2603V/R** |
| 5 | 00**2**00000000000000 | 5 | ***Streptococcus zooepidemicus str.* MGCS10565** |
| R | Phyletic Pattern | # | Description |
| 1 | **2**00000000 | 88 | ***Bradyrhizobium japonicum USDA 110*** |
| 2 | **2**11111111 | 44 | ***Bradyrhizobium japonicum USDA 110*** |
| 3 | 11**2**111111 | 27 | ***Bradyrhizobium sp. BTAi1*** |
| 4 | 00**2**000000 | 30 | ***Bradyrhizobium sp. BTAi1*** |
| 5 | 211000000 | 25 | ***Bradyrhizobium japonicum USDA 110*** |
| R | Phyletic Pattern | # | Description |
| 1 | 11**2**111111111 | 15 | ***Bacillus cereus ATCC 10987*** |
| 2 | 11111111111**2** | 15 | ***Bacillus weihenstephanensis KBAB4*** |
| 3 | 111111**2**11111 | 13 | ***Bacillus cereus G9842*** |
| 4 | 00**2**000000000 | 10 | ***Bacillus cereus ATCC 10987*** |
| 5 | 1**2**1111111111 | 7 | ***Bacillus cereus AH187*** |
| R | Phyletic Pattern | # | Description |
| 1 | **2**000000 | 19 | ***Helicobacter acinonychis str.* Sheeba** |
| 2 | **2**111111 | 6 | ***Helicobacter acinonychis str.* Sheeba** |
| 3 | 0000**2**00 | 5 | ***Helicobacter pylori* Shi470** |
| 4 | 000**2**000 | 2 | ***Helicobacter pylori* HPAG1** |
| 5 | 00000**2**0 | 4 | ***Helicobacter pylori* P12** |
| R | Phyletic Pattern | # | Description |
| 1 | 0**2**000000000 | 17 | ***Neisseria gonorrhoeae NCCP11945*** |
| 2 | 1111**2**111111 | 13 | ***Neisseria meningitidis MC58*** |
| 3 | 0000000000**2** | 8 | ***Neisseria meningitidis serogroup W-135*** |
| 4 | **22**000000000 | 7 | ***Neisseria gonorrhoeae*** |
| 5 | 00**2**00000000 | 5 | ***Neisseria lactamica ST640*** |
| R | Phyletic Pattern | # | Description |
| 1 | 111111**2** | 61 | ***Sulfolobus solfataricus P2*** |
| 2 | 000000**2** | 23 | ***Sulfolobus solfataricus P2*** |
| 3 | **2**111111 | 7 | ***Sulfolobus islandicus Y.G.57.14*** |
| 4 | **2**000000 | 6 | ***Sulfolobus islandicus Y.G.57.14*** |
| 5 | 011**2**111 | 4 | ***Sulfolobus islandicus Y.N.15.51*** |
| R | Phyletic Pattern | # | Description |
| 1 | **2**1111 | 80 | ***Pseudomonas fluorescens Pf-5*** |
| 2 | 111**2**1 | 34 | P***seudomonas putida W619*** |
| 3 | **2**0000 | 24 | ***Pseudomonas fluorescens Pf-5*** |
| 4 | 11**2**11 | 20 | ***Pseudomonas putida GB-1*** |
| 5 | 1**2**111 | 18 | ***Pseudomonas putida KT2440*** |
