# Supplementary material for: Horizontal Transfer, Not Duplication, Drives the Expansion of Protein Families in Prokaryotes
Source: PLOS journal article supplement (doi:10.1371/journal.pgen.1001284), 2011-01-27
Supplement: S7 (10.1371/journal.pgen.1001284.s007) [file journal.pgen.1001284.s007]

|  | Ancestral Node = 0 | Ancestral Node = 1 | Ancestral Node = 2 |
| --- | --- | --- | --- |
| Current Node = 0 | *No Change* | *Gene loss* | Synolog Loss* |
| Current Node = 1 | *Gene Gain (HGT)* | *No Change* | Synolog Loss |
| Current Node = 2 | Synolog Gain* (HGT/IGD) | Synolog Gain  (HGT/IGD) | *No Change* |
